# Supplementary material for: A Study on Symbiotic Systems of Cicadas Provides New Insights into Distribution of Microbial Symbionts and Improves Fluorescence In Situ Hybridization Technique
Source: MDPI journal article supplement (doi:10.3390/ijms24032434), 2023-01-26
Supplement: s1 [file s1]

## Supplemental materials

**Table S1.** Cicada samples used for diagnostic PCR amplification in this study

| Species          | Symbiont      | Numbers of positive individuals/total numbers of individuals tested |      |      |      |      |     |     |       |       |
|------------------|---------------|---------------------------------------------------------------------|------|------|------|------|-----|-----|-------|-------|
|                  |               | SG                                                                  | FC   | CS   | MG   | HG   | TE  | OV  | FB    | BA    |
| <i>Karenia</i>   | <i>Sulcia</i> | 0/12                                                                | 0/12 | 0/12 | 0/12 | 0/12 | 0/6 | 6/6 | 0/12  | 12/12 |
| <i>caelatata</i> | YLS           | 0/12                                                                | 0/12 | 0/12 | 0/12 | 0/12 | 0/6 | 6/6 | 12/12 | 0/12  |
| <i>Tanna</i> sp. | <i>Sulcia</i> | 0/10                                                                | 0/10 | 0/10 | 0/10 | 0/10 | 0/5 | 5/5 | 0/10  | 10/10 |
|                  | YLS           | 0/10                                                                | 0/10 | 0/10 | 0/10 | 0/10 | 0/5 | 5/5 | 10/10 | 0/10  |

Abbreviations: SG, salivary glands; FC, filter chamber; CS, conical segment; MG, midgut; HG, hindgut; TE, testes; OV, ovaries; FB, fat bodies; BA, bacteriomes.

**Table S2.** NCBI blast results for the *Sulcia* and yeast-like fungal symbiont obtained from *Karenia caelatata* and *Tanna* sp.

| Symbionts                                 | Query coverage | Representative sequences in GenBank                    | Percent identity (%) |
|-------------------------------------------|----------------|--------------------------------------------------------|----------------------|
| <i>Sulcia</i> of <i>Tanna</i> sp.         | 100%           | <i>Sulcia</i> of <i>Tanna japonensis</i> (LC370573.1)  | 99.40%               |
|                                           | 100%           | <i>Sulcia</i> of <i>Terpnosia vacua</i> (LC370693.1)   | 98.96%               |
|                                           | 100%           | <i>Sulcia</i> of <i>Te. nigricosta</i> (LC370570.1)    | 98.81%               |
| <i>Sulcia</i> of <i>Karenia caelatata</i> | 100%           | <i>Sulcia</i> of <i>Meimunna iwasakii</i> (LC370740.1) | 99.93%               |
|                                           | 100%           | <i>Sulcia</i> of <i>Me. kuroiwa</i> (LC370734.1)       | 99.93%               |
|                                           | 100%           | <i>Sulcia</i> of <i>Me. oshimensis</i> (LC370730.1)    | 99.85%               |
| YLS of <i>Tanna</i> sp.                   | 99%            | YLS of <i>Mogannia minuta</i> (LC370999.1)             | 95.38%               |
|                                           | 99%            | YLS of <i>Euterpnosia chibensis</i> (LC370887.1)       | 95.11%               |
|                                           | 99%            | YLS of <i>Ta. japonensis</i> (LC370811.1)              | 93.49%               |
| YLS of <i>Karenia caelatata</i>           | 94%            | YLS of <i>Me. oshimensis</i> (LC370947.1)              | 92.95%               |
|                                           | 93%            | YLS of <i>Me. opalifera</i> (LC371018.1)               | 90.78%               |
|                                           | 94%            | YLS of <i>Ta. japonensis</i> (LC370901.1)              | 92.77%               |

**Table S3.** The primers for amplification of dominant symbionts in this study

| Target        | Primer name       | Primer sequence (5'–3')   | References               |
|---------------|-------------------|---------------------------|--------------------------|
| <i>Sulcia</i> | 10_CFB_FF         | AGAGTTTGATCATGGCTCAGGATG  | Moran et al., 2005       |
| (16S rRNA)    | 1515_R            | GTACGGCTACCTTGTTACGACTTAG |                          |
| YLS           | Fng18S_82F        | GAAACTGCGAATGGCT          | Matsuura et al.,<br>2018 |
| (18S rRNA)    | NS4               | CTTCCGTCAATTCCTTTAAG      |                          |
| YLS           | Fng18S_82F        | GAAACTGCGAATGGCT          | Matsuura et al.,<br>2018 |
| (18S rRNA)    | Fng18S_106<br>7R  | TMTCGTAAGGTGCCGA          |                          |
| YLS           | Hyp325F           | GTTTGGGTAGTGGCCAAAC       | Matsuura et al.,<br>2018 |
| (18S rRNA)    | Hyp760R           | CCTGCCTGGAGCACTCT         |                          |
| YLS           | CFS2-CS           | TTCAACGAGGAAYCCCTA        | Matsuura et al.,<br>2018 |
| (18S rRNA)    | LSU_CS-1R         | GCTTCACTCGCCGTTAC         |                          |
| YLS           | ITS_CS-1F         | CATCGAATCTTTGAACGC        | Matsuura et al.,<br>2018 |
| (28S rRNA)    | NLB1_CS           | CTTTACCTCATAAAACTGAGNTCG  |                          |
| YLS           | RPB1-OhpF1        | GTCTWCCACCCGGGCTT         | Matsuura et al.,<br>2018 |
| (RPB1)        | RPB1-OhpR1        | GGCRATGTCGTTGTCCAT        |                          |
| YLS           | RPB2-OphF1        | YAAGAAGCGYCTCGACCT        | Matsuura et al.,<br>2018 |
| (RPB2)        | RPB2-OphR2        | GGCAGACTGGTACGTGTT        |                          |
| YLS           | Ef1α-OphF1        | CCGGCCACCGTGACTTCAT       | Matsuura et al.,<br>2018 |
| (Ef1α)        | Ef1α-Oph221<br>8R | ATGACACCGACGGCRMCGGTYTG   |                          |

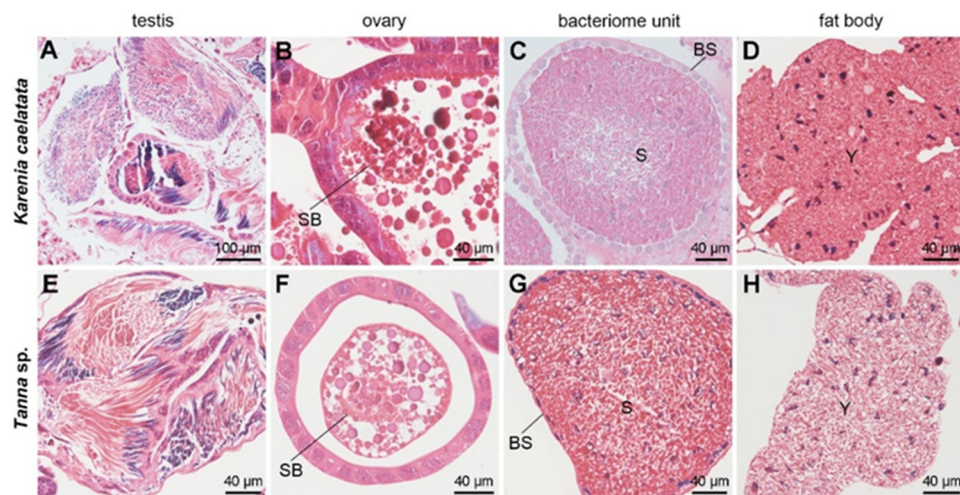

**Figure S1.** Histological microscopy showing the distribution of *Sulcia* and YLS in the testes, ovaries, bacteriomes and fat bodies of *Karenia caelata* and *Tanna* sp. Abbreviations: BS, bacteriome sheath; S, *Sulcia*; Y, yeast-like fungal symbiont.

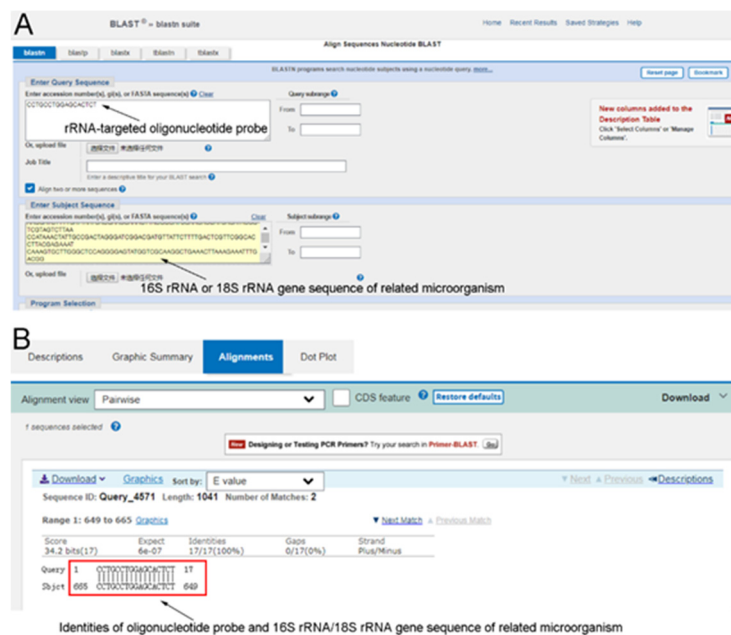

**Figure S2.** The identities of rRNA-targeted oligonucleotide probe and 16S rRNA/18S rRNA gene sequence of targeted microorganisms.

| <b>Solution</b>        | <b>Time</b> | <b>Temperature</b> |
|------------------------|-------------|--------------------|
| Xylene                 | 20 min      | room temperature   |
| ↓                      |             |                    |
| Xylene                 | 20 min      | room temperature   |
| ↓                      |             |                    |
| 100% ethanol           | 10 min      | room temperature   |
| ↓                      |             |                    |
| 100% ethanol           | 10 min      | room temperature   |
| ↓                      |             |                    |
| 90% ethanol            | 5 min       | room temperature   |
| ↓                      |             |                    |
| 80% ethanol            | 5 min       | room temperature   |
| ↓                      |             |                    |
| 70% ethanol            | 5 min       | room temperature   |
| ↓                      |             |                    |
| Double-distilled water | 5 min       | room temperature   |
| ↓                      |             |                    |
| Hematoxylin            | 8 min       | room temperature   |
| ↓                      |             |                    |
| Double-distilled water | 30 s        | room temperature   |
| ↓                      |             |                    |
| Eosin                  | 10 min      | room temperature   |
| ↓                      |             |                    |
| Double-distilled water | 30 s        | room temperature   |

**Figure S3.** The detailed protocol for the paraffin sections stained with hematoxylin and eosin.

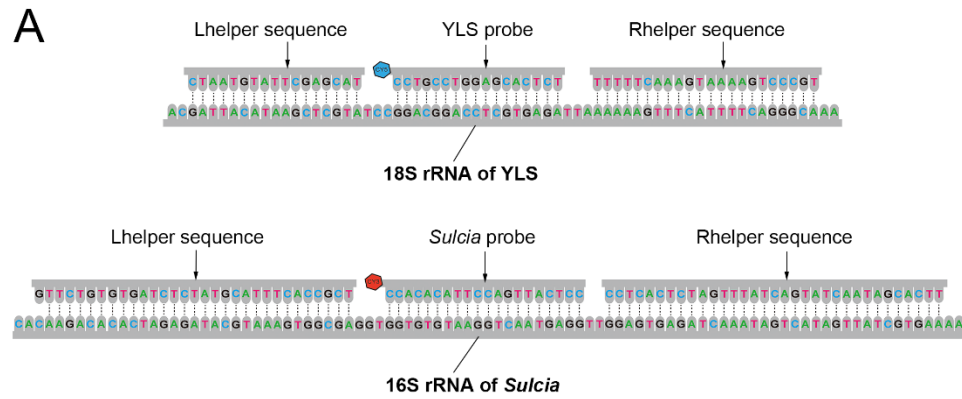

**B**

| <b>Solution</b>        | <b>Time</b> | <b>Temperature</b> |
|------------------------|-------------|--------------------|
| Xylene                 | 20 min      | room temperature   |
| ↓                      |             |                    |
| Xylene                 | 20 min      | room temperature   |
| ↓                      |             |                    |
| 100% ethanol           | 10 min      | room temperature   |
| ↓                      |             |                    |
| 100% ethanol           | 10 min      | room temperature   |
| ↓                      |             |                    |
| 90% ethanol            | 5 min       | room temperature   |
| ↓                      |             |                    |
| 80% ethanol            | 5 min       | room temperature   |
| ↓                      |             |                    |
| 70% ethanol            | 5 min       | room temperature   |
| ↓                      |             |                    |
| Double-distilled water | 5 min       | room temperature   |
| ↓                      |             |                    |
| Hybridization buffer   | 8-12 h      | 37 °C              |
| ↓                      |             |                    |
| 2xSSC                  | ~1 h        | 37 °C              |
| ↓                      |             |                    |
| Double-distilled water | 5 min       | room temperature   |
| ↓                      |             |                    |
| DAPI solution          | ~3 min      | room temperature   |
| ↓                      |             |                    |
| Double-distilled water | 2 min       | room temperature   |

**Figure S4.** Schematic diagram showing the target sites of probe sequences and adjacent unlabeled helper sequences and the detailed protocol using for the hybridization procedure.
